# Supplementary material for: Evolving better solvate electrolytes for lithium secondary batteries
Source: Royal Society of Chemistry journal article supplement (doi:10.1039/d4sc01492h), 2024-01-01
Supplement: d4sc01492h1.zip [file d4sc01492h1.zip]

## Sheet: LiSL2TfNCN
0.0173087	0.000361546
0.83198	0.00841828		value	error	unit
0.0826177	0.0085562	𝜎 𝑖𝑜𝑛	0.0173087	0.000361546	S / m			0.173(4) mS/cm
3.11023	0.0746456	tPPLi	0.83198	0.00841828				0.832(8)
		Dsalt	1.30573e-11	1.35224e-12	m^2 / s			1.31(14) x 10^-11 m^2/s
			0.1625	0.0039	V			163(4) mV
		c salt	3426.24	2.14258	mol / m^3			3.426(2) M
		D+	1.70617e-12	8.49068e-14	m^2 / s			1.71(8) x 10^-12 m^2/s
		D-	1.03482e-12	2.86884e-14	m^2 / s			1.03(3) x 10^-12 m^2/s
		Dsulfolan	1.63657e-12	1.70568e-14	m^2 / s			1.64(2) x 10^-12 m^2/s
			Enter experimental values above
									DERIVATIVES
									A1	A2	A3	A4
		𝜎++	0.0164751	0.000976986	1 / ohm m			0.165(10) mS/cm	0.428298	-0.00593049	0.109683	-0.00291354
		𝜎--	0.0098954	0.00222569	1 / ohm m			0.099(22) mS/cm	-0.571702	-0.0826816	0.239547	-0.00636312
		𝜎+-	0.00453089	0.00159181	1 / ohm m			0.045(16) mS/cm	-0.571702	-0.044306	0.174615	-0.00463833
		self +	0.0215909	0.00107455	1 / ohm m			0.216(11) mS/cm
		self -	0.0130953	0.000363133	1 / ohm m			0.131(4) mS/cm
		distinct ++	-0.00511579	0.00145229	1 / ohm m			-0.051(15) mS/cm
		distinct --	-0.00319989	0.00225512	1 / ohm m			-0.032(23) mS/cm
		cross	-0.0173775	0.00416296	1 / ohm m			-0.174(42) mS/cm
		self	0.0346861	0.00143768				0.347(14) mS/cm
		alpha	0.624754	0.0575863				0.62(6)
		beta	0.343634	0.124813				0.34(14)
		Nernst-Einstein	0.500992
		Ionicity	0.499008	0.0193627				50(2)%
	check
	teNMR		0.690068	0.0558259
	tABC		0.83198
	conductivity		0.0173087
	thermodynamic factor		10.0352
		self	0.0346861					0.347(0) mS/cm

## Sheet: LiSL2TfNMs
0.0131743	0.000245141
0.868988	0.0341082		value	error	unit
0.0333077	0.0057454	𝜎 𝑖𝑜𝑛	0.0131743	0.000245141	S / m			0.132(2) mS/cm
2.49776	0.661563	tPPLi	0.868988	0.0341082				0.869(34)
		Dsalt	5.68739e-12	9.81038e-13	m^2 / s			0.57(10) x 10^-11 m^2/s
			0.1305	0.0345646	V			131(35) mV
		c salt	3171.25	1.79914	mol / m^3			3.171(2) M
		D+	1.30208e-12	2.84634e-14	m^2 / s			1.30(3) x 10^-12 m^2/s
		D-	7.05981e-13	1.12092e-14	m^2 / s			0.71(1) x 10^-12 m^2/s
		Dsulfolan	1.14588e-12	1.35878e-14	m^2 / s			1.15(1) x 10^-12 m^2/s
			Enter experimental values above
									DERIVATIVES
									A1	A2	A3	A4
		𝜎++	0.0114952	0.000503522	1 / ohm m			0.115(5) mS/cm	0.822246	0.0120539	0.0198953	-0.000265306
		𝜎--	0.00234178	0.0016802	1 / ohm m			0.023(17) mS/cm	-0.177754	-0.0232642	0.140615	-0.00187511
		𝜎+-	0.000331334	0.000867374	1 / ohm m			0.003(9) mS/cm	-0.177754	-0.00560516	0.0802552	-0.00107021
		self +	0.015251	0.000333499	1 / ohm m			0.153(3) mS/cm
		self -	0.00826903	0.000131375	1 / ohm m			0.083(1) mS/cm
		distinct ++	-0.00375581	0.00060395	1 / ohm m			-0.038(6) mS/cm
		distinct --	-0.00592724	0.00168533	1 / ohm m			-0.059(17) mS/cm
		cross	-0.0103457	0.00249288	1 / ohm m			-0.103(25) mS/cm
		self	0.02352	0.000464873				0.235(5) mS/cm
		alpha	0.830759	0.10531				0.83(11)
		beta	0.0478911	0.125517				0.05(14)
		Nernst-Einstein	0.439869
		Ionicity	0.560131	0.0134722				56(1)%
	check
	teNMR		0.847396	0.0500531
	tABC		0.868988
	conductivity		0.0131743
	thermodynamic factor		16.3676
		self	0.02352	0.000464873				0.235(5) mS/cm

## Sheet: LiSL2TfNAc
0.0101095	0.000275546
0.891107	0.0183411		value	error	unit
0.0810477	0.00847715	𝜎 𝑖𝑜𝑛	0.0101095	0.000275546	S / m			0.101(3) mS/cm
2.62357	0.349885	tPPLi	0.891107	0.0183411				0.891(18)
		Dsalt	1.35375e-11	1.41592e-12	m^2 / s			1.35(14) x 10^-11 m^2/s
			0.137073	0.0182804	V			137(18) mV
		c salt	3241.91	1.97561	mol / m^3			3.242(2) M
		D+	1.7985e-12	1.9183e-13	m^2 / s			1.80(19) x 10^-12 m^2/s
		D-	1.59248e-12	2.24782e-14	m^2 / s			1.59(2) x 10^-12 m^2/s
		Dsulfolan	4.23279e-12	1.43018e-13	m^2 / s			4.23(14) x 10^-12 m^2/s
			Enter experimental values above
									DERIVATIVES
									A1	A2	A3	A4
		𝜎++	0.0155046	0.00336488	1 / ohm m			0.155(34) mS/cm	-0.280486	-0.0701261	0.226289	-0.00699056
		𝜎--	0.0129451	0.00517117	1 / ohm m			0.129(52) mS/cm	-1.28049	-0.147933	0.319445	-0.00986833
		𝜎+-	0.0091701	0.00426292	1 / ohm m			0.092(43) mS/cm	-1.28049	-0.10903	0.272867	-0.00842944
		self +	0.0215349	0.00229697	1 / ohm m			0.215(23) mS/cm
		self -	0.019068	0.000269401	1 / ohm m			0.191(3) mS/cm
		distinct ++	-0.00603031	0.00407413	1 / ohm m			-0.060(41) mS/cm
		distinct --	-0.00612289	0.00517819	1 / ohm m			-0.061(52) mS/cm
		cross	-0.0304934	0.0107751	1 / ohm m			-0.305(108) mS/cm
		self	0.040603	0.00256637				0.406(26) mS/cm
		alpha	0.544983	0.118184				0.54(13)
		beta	0.644653	0.330685				0.64(36)
		Nernst-Einstein	0.751015
		Ionicity	0.248985	0.0157221				25(2)%
	check
	teNMR		0.626588	0.25165
	tABC		0.891107
	conductivity		0.0101095
	thermodynamic factor		7.02594
		self	0.040603	0.00256637				0.41(3) mS/cm
